# Supplementary material for: Outbreak of KPC-2-producing Klebsiella pneumoniae endowed with ceftazidime-avibactam resistance mediated through a VEB-1-mutant (VEB-25), Greece, September to October 2019
Source: PubMed Central journal article supplement (PMC6988274; doi:10.2807/1560-7917.es.2020.25.3.2000028), 2020-01-23

**Supplementary Table S1.** Antimicrobial susceptibility and genotypic characteristics of CZA-resistant *Klebsiella pneumoniae* strains isolated from the eight patients

"This supplementary material is hosted by Eurosurveillance as supporting information alongside the article [Outbreak of KPC-2-producing *Klebsiella pneumoniae* endowed with ceftazidime-avibactam resistance mediated through a VEB-1-mutant (VEB-25), Greece, September to November 2019], on behalf of the authors, who remain responsible for the accuracy and appropriateness of the content. The same standards for ethics, copyright, attributions and permissions as for the article apply. Supplements are not edited by Eurosurveillance and the journal is not responsible for the maintenance of any links or email addresses provided therein."

| Case                                             | 1                                                                                                                                  | 2                                                                                                                                            |                                                                                                                                    | 3                                                                                                                                  |                                                                                                                                              | 4                                                                                                                                            | 5                                                                                                                                            | 6                                                                                                                                            |                                                                                                                                              | 7                                                                                                                                  | 8                                                                                                                                            |
|--------------------------------------------------|------------------------------------------------------------------------------------------------------------------------------------|----------------------------------------------------------------------------------------------------------------------------------------------|------------------------------------------------------------------------------------------------------------------------------------|------------------------------------------------------------------------------------------------------------------------------------|----------------------------------------------------------------------------------------------------------------------------------------------|----------------------------------------------------------------------------------------------------------------------------------------------|----------------------------------------------------------------------------------------------------------------------------------------------|----------------------------------------------------------------------------------------------------------------------------------------------|----------------------------------------------------------------------------------------------------------------------------------------------|------------------------------------------------------------------------------------------------------------------------------------|----------------------------------------------------------------------------------------------------------------------------------------------|
| Isolate                                          | KP121                                                                                                                              | KP370                                                                                                                                        | KP67585                                                                                                                            | KP374                                                                                                                              | KP76706                                                                                                                                      | KP368                                                                                                                                        | KP501                                                                                                                                        | KP687                                                                                                                                        | KP4969                                                                                                                                       | KP785                                                                                                                              | KP842                                                                                                                                        |
| Source                                           | rectal                                                                                                                             | rectal                                                                                                                                       | blood                                                                                                                              | rectal                                                                                                                             | VAP                                                                                                                                          | rectal                                                                                                                                       | rectal                                                                                                                                       | rectal                                                                                                                                       | blood                                                                                                                                        | rectal                                                                                                                             | rectal                                                                                                                                       |
| PFGE                                             | Pulsotype I                                                                                                                        | Pulsotype II                                                                                                                                 |                                                                                                                                    | Pulsotype II                                                                                                                       |                                                                                                                                              | Pulsotype II                                                                                                                                 | Pulsotype II                                                                                                                                 | Pulsotype II                                                                                                                                 |                                                                                                                                              | Pulsotype II                                                                                                                       | Pulsotype II                                                                                                                                 |
| MLST-type                                        | ST39                                                                                                                               | ND                                                                                                                                           | ST147                                                                                                                              | ST147                                                                                                                              | ND                                                                                                                                           | ST147                                                                                                                                        | ST147                                                                                                                                        | ST147                                                                                                                                        | ND                                                                                                                                           | ST147                                                                                                                              | ST147                                                                                                                                        |
| KPC-type                                         | KPC-2                                                                                                                              | KPC-2                                                                                                                                        | KPC-2                                                                                                                              | KPC-2                                                                                                                              | KPC-2                                                                                                                                        | KPC-2                                                                                                                                        | KPC-2                                                                                                                                        | KPC-2                                                                                                                                        | KPC-2                                                                                                                                        | KPC-2                                                                                                                              | KPC-2                                                                                                                                        |
| <b>Ampicillin/Sulbactam</b>                      | >16                                                                                                                                | >16                                                                                                                                          | >16                                                                                                                                | >16                                                                                                                                | >16                                                                                                                                          | >16                                                                                                                                          | >16                                                                                                                                          | >16                                                                                                                                          | >16                                                                                                                                          | >16                                                                                                                                | >16                                                                                                                                          |
| <b>Piperacillin/Tazobactam</b>                   | >64                                                                                                                                | >64                                                                                                                                          | >64                                                                                                                                | >64                                                                                                                                | >64                                                                                                                                          | >64                                                                                                                                          | >64                                                                                                                                          | >64                                                                                                                                          | >64                                                                                                                                          | >64                                                                                                                                | >64                                                                                                                                          |
| <b>Cefoxitin</b>                                 | >32                                                                                                                                | >32                                                                                                                                          | >32                                                                                                                                | >32                                                                                                                                | >32                                                                                                                                          | >32                                                                                                                                          | >32                                                                                                                                          | >32                                                                                                                                          | >32                                                                                                                                          | >32                                                                                                                                | >32                                                                                                                                          |
| <b>Ceftazidime</b>                               | 2048                                                                                                                               | 1024                                                                                                                                         | 1024                                                                                                                               | 1024                                                                                                                               | 1024                                                                                                                                         | 512                                                                                                                                          | 1024                                                                                                                                         | 512                                                                                                                                          | 1024                                                                                                                                         | 1024                                                                                                                               | 1024                                                                                                                                         |
| <b>Ceftazidime/Avibactam</b>                     | 64                                                                                                                                 | 64                                                                                                                                           | 64                                                                                                                                 | 32                                                                                                                                 | 32                                                                                                                                           | 64                                                                                                                                           | 64                                                                                                                                           | 64                                                                                                                                           | 64                                                                                                                                           | 32                                                                                                                                 | 64                                                                                                                                           |
| <b>Ceftriaxone</b>                               | >32                                                                                                                                | >32                                                                                                                                          | >32                                                                                                                                | >32                                                                                                                                | >32                                                                                                                                          | >32                                                                                                                                          | >32                                                                                                                                          | >32                                                                                                                                          | >32                                                                                                                                          | >32                                                                                                                                | >32                                                                                                                                          |
| <b>Cefepime</b>                                  | >32                                                                                                                                | >32                                                                                                                                          | >32                                                                                                                                | >32                                                                                                                                | >32                                                                                                                                          | >32                                                                                                                                          | >32                                                                                                                                          | >32                                                                                                                                          | >32                                                                                                                                          | >32                                                                                                                                | >32                                                                                                                                          |
| <b>Aztreonam</b>                                 | >32                                                                                                                                | >32                                                                                                                                          | >32                                                                                                                                | >32                                                                                                                                | >32                                                                                                                                          | >32                                                                                                                                          | >32                                                                                                                                          | >32                                                                                                                                          | >32                                                                                                                                          | >32                                                                                                                                | >32                                                                                                                                          |
| <b>Imipenem</b>                                  | 64                                                                                                                                 | 32                                                                                                                                           | 32                                                                                                                                 | 32                                                                                                                                 | 32                                                                                                                                           | 32                                                                                                                                           | 32                                                                                                                                           | 8                                                                                                                                            | 16                                                                                                                                           | 32                                                                                                                                 | 32                                                                                                                                           |
| <b>Imipenem/Relebactam</b>                       | 0.5                                                                                                                                | 0.5                                                                                                                                          | 0.5                                                                                                                                | 0.5                                                                                                                                | 0.5                                                                                                                                          | 0.5                                                                                                                                          | 0.5                                                                                                                                          | 0.25                                                                                                                                         | 0.25                                                                                                                                         | 0.12                                                                                                                               | 0.25                                                                                                                                         |
| <b>Meropenem</b>                                 | >64                                                                                                                                | 64                                                                                                                                           | 64                                                                                                                                 | 64                                                                                                                                 | 64                                                                                                                                           | 64                                                                                                                                           | 32                                                                                                                                           | 16                                                                                                                                           | 16                                                                                                                                           | 16                                                                                                                                 | 16                                                                                                                                           |
| <b>Meropenem/Vaborbactam</b>                     | 0.5                                                                                                                                | 0.25                                                                                                                                         | 0.25                                                                                                                               | 0.125                                                                                                                              | 0.125                                                                                                                                        | 0.125                                                                                                                                        | 0.25                                                                                                                                         | 0.125                                                                                                                                        | 0.125                                                                                                                                        | 0.125                                                                                                                              | 0.125                                                                                                                                        |
| <b>Amikacin</b>                                  | >32                                                                                                                                | >32                                                                                                                                          | >32                                                                                                                                | >32                                                                                                                                | >32                                                                                                                                          | >32                                                                                                                                          | >32                                                                                                                                          | >32                                                                                                                                          | >32                                                                                                                                          | >32                                                                                                                                | >32                                                                                                                                          |
| <b>Gentamicin</b>                                | >8                                                                                                                                 | >8                                                                                                                                           | >8                                                                                                                                 | >8                                                                                                                                 | >8                                                                                                                                           | >8                                                                                                                                           | >8                                                                                                                                           | >8                                                                                                                                           | >8                                                                                                                                           | >8                                                                                                                                 | >8                                                                                                                                           |
| <b>Ciprofloxacin</b>                             | >2                                                                                                                                 | >2                                                                                                                                           | >2                                                                                                                                 | >2                                                                                                                                 | >2                                                                                                                                           | >2                                                                                                                                           | >2                                                                                                                                           | >2                                                                                                                                           | >2                                                                                                                                           | >2                                                                                                                                 | >2                                                                                                                                           |
| <b>Levofloxacin</b>                              | >4                                                                                                                                 | >4                                                                                                                                           | >4                                                                                                                                 | >4                                                                                                                                 | >4                                                                                                                                           | >4                                                                                                                                           | >4                                                                                                                                           | >4                                                                                                                                           | >4                                                                                                                                           | >4                                                                                                                                 | >4                                                                                                                                           |
| <b>Tigecycline</b>                               | >4                                                                                                                                 | >4                                                                                                                                           | >4                                                                                                                                 | 4                                                                                                                                  | 4                                                                                                                                            | >4                                                                                                                                           | >4                                                                                                                                           | 2                                                                                                                                            | 2                                                                                                                                            | 2                                                                                                                                  | 2                                                                                                                                            |
| <b>Fosfomycin</b>                                | 64                                                                                                                                 | 128                                                                                                                                          | 128                                                                                                                                | 64                                                                                                                                 | 64                                                                                                                                           | 128                                                                                                                                          | 128                                                                                                                                          | >128                                                                                                                                         | >128                                                                                                                                         | 64                                                                                                                                 | >128                                                                                                                                         |
| <b>Colistin</b>                                  | 2                                                                                                                                  | 64                                                                                                                                           | 64                                                                                                                                 | 128                                                                                                                                | 128                                                                                                                                          | 128                                                                                                                                          | 64                                                                                                                                           | 2                                                                                                                                            | 16                                                                                                                                           | 8                                                                                                                                  | 1                                                                                                                                            |
| <b>Trimethoprim/Sulfamethoxazole<sup>a</sup></b> | >8                                                                                                                                 | >8                                                                                                                                           | >8                                                                                                                                 | >8                                                                                                                                 | >8                                                                                                                                           | >8                                                                                                                                           | >8                                                                                                                                           | >8                                                                                                                                           | >8                                                                                                                                           | >8                                                                                                                                 | >8                                                                                                                                           |
| <b>Other β-lactamase genes</b>                   | <i>bla</i> <sub>SHV-11</sub> ,<br><i>bla</i> <sub>VEB-14</sub> ,<br><i>bla</i> <sub>OXA-10</sub> ,<br><i>bla</i> <sub>TEM-1B</sub> | <i>bla</i> <sub>SHV</sub> -like,<br><i>bla</i> <sub>VEB-25</sub> ,<br><i>bla</i> <sub>OXA-10</sub> -like,<br><i>bla</i> <sub>TEM</sub> -like | <i>bla</i> <sub>SHV-11</sub> ,<br><i>bla</i> <sub>VEB-25</sub> ,<br><i>bla</i> <sub>OXA-10</sub> ,<br><i>bla</i> <sub>TEM-1B</sub> | <i>bla</i> <sub>SHV-11</sub> ,<br><i>bla</i> <sub>VEB-25</sub> ,<br><i>bla</i> <sub>OXA-10</sub> ,<br><i>bla</i> <sub>TEM-1B</sub> | <i>bla</i> <sub>SHV</sub> -like,<br><i>bla</i> <sub>VEB-25</sub> ,<br><i>bla</i> <sub>OXA-10</sub> -like,<br><i>bla</i> <sub>TEM</sub> -like | <i>bla</i> <sub>SHV</sub> -like,<br><i>bla</i> <sub>VEB-25</sub> ,<br><i>bla</i> <sub>OXA-10</sub> -like,<br><i>bla</i> <sub>TEM</sub> -like | <i>bla</i> <sub>SHV</sub> -like,<br><i>bla</i> <sub>VEB-25</sub> ,<br><i>bla</i> <sub>OXA-10</sub> -like,<br><i>bla</i> <sub>TEM</sub> -like | <i>bla</i> <sub>SHV</sub> -like,<br><i>bla</i> <sub>VEB-25</sub> ,<br><i>bla</i> <sub>OXA-10</sub> -like,<br><i>bla</i> <sub>TEM</sub> -like | <i>bla</i> <sub>SHV</sub> -like,<br><i>bla</i> <sub>VEB-25</sub> ,<br><i>bla</i> <sub>OXA-10</sub> -like,<br><i>bla</i> <sub>TEM</sub> -like | <i>bla</i> <sub>SHV-11</sub> ,<br><i>bla</i> <sub>VEB-25</sub> ,<br><i>bla</i> <sub>OXA-10</sub> ,<br><i>bla</i> <sub>TEM-1B</sub> | <i>bla</i> <sub>SHV</sub> -like,<br><i>bla</i> <sub>VEB-25</sub> ,<br><i>bla</i> <sub>OXA-10</sub> -like,<br><i>bla</i> <sub>TEM</sub> -like |
| <b>Other resistance determinants</b>             | <i>aac(3)-IId</i> ,<br><i>aadA1</i> ,<br><i>aadA2</i> ,<br><i>ant(2'')-Ia</i> ,<br><i>aph(3'')-Ib</i> ,<br><i>aph(3'')-Ia</i> ,    | ND                                                                                                                                           | <i>aadA1</i> ,<br><i>aadA2</i> ,<br><i>ant(2'')-Ia</i> ,<br><i>aph(3'')-Ib</i> ,<br><i>aph(3'')-Ia</i> ,                           | <i>aadA1</i> ,<br><i>aadA2</i> ,<br><i>ant(2'')-Ia</i> ,<br><i>aph(3'')-Ib</i> ,<br><i>aph(3'')-Ia</i> ,                           | ND                                                                                                                                           | ND                                                                                                                                           | ND                                                                                                                                           | ND                                                                                                                                           | ND                                                                                                                                           | <i>aadA1</i> ,<br><i>aadA2</i> ,<br><i>ant(2'')-Ia</i> ,<br><i>aph(3'')-Ib</i> ,<br><i>aph(3'')-Ia</i> ,                           | ND                                                                                                                                           |

|                             |               |                                                                                                                                                                                                                                                                         |    |                                                                                                                                                      |                                                                                                                                                      |    |    |    |    |    |                                                                                                                                                      |            |    |
|-----------------------------|---------------|-------------------------------------------------------------------------------------------------------------------------------------------------------------------------------------------------------------------------------------------------------------------------|----|------------------------------------------------------------------------------------------------------------------------------------------------------|------------------------------------------------------------------------------------------------------------------------------------------------------|----|----|----|----|----|------------------------------------------------------------------------------------------------------------------------------------------------------|------------|----|
|                             |               | <i>aph(3'')-Ib,</i><br><i>aph(3')-Ia,</i><br><i>aph(6)-Id,</i><br><i>rmtB, fosA,</i><br><i>arr-2,</i><br><i>cmlA1,</i><br><i>dfrA12,</i><br><i>dfrA14,</i><br><i>dfrA23,</i><br><i>tet(A),</i><br><i>tet(G),</i><br><i>tet(M),</i><br><i>sul1, sul2,</i><br><i>sul3</i> |    | <i>aph(6)-Id,</i><br><i>rmtB,</i><br><i>fosA, arr-2,</i><br><i>cmlA1,</i><br><i>dfrA12,</i><br><i>tet(A),</i><br><i>tet(G),</i><br><i>sul1, sul2</i> | <i>aph(6)-Id,</i><br><i>rmtB,</i><br><i>fosA, arr-2,</i><br><i>cmlA1,</i><br><i>dfrA12,</i><br><i>tet(A),</i><br><i>tet(G),</i><br><i>sul1, sul2</i> |    |    |    |    |    | <i>aph(6)-Id,</i><br><i>rmtB,</i><br><i>fosA, arr-2,</i><br><i>cmlA1,</i><br><i>dfrA12,</i><br><i>tet(A),</i><br><i>tet(G),</i><br><i>sul1, sul2</i> |            |    |
| <b>Major porin mutation</b> | <b>OmpK35</b> | WT                                                                                                                                                                                                                                                                      | ND | PSC_aa173                                                                                                                                            | PSC_aa173                                                                                                                                            | ND | ND | ND | ND | ND | ND                                                                                                                                                   | PSC_aa173  | ND |
|                             | <b>OmpK36</b> | v3 variant                                                                                                                                                                                                                                                              | ND | v3 variant                                                                                                                                           | v3 variant                                                                                                                                           | ND | ND | ND | ND | ND | ND                                                                                                                                                   | v3 variant | ND |
|                             | <b>OmpK37</b> | PSC_aa251                                                                                                                                                                                                                                                               | ND | WT                                                                                                                                                   | WT                                                                                                                                                   | ND | ND | ND | ND | ND | ND                                                                                                                                                   | WT         | ND |

<sup>a</sup> Trimethoprim-sulfamethoxazole in the ratio 1:19. MICs are expressed as the trimethoprim concentration.

WT, wild-type; ND, not determined; PSC, premature stop codon; OmpK35-WT, GU460162; OmpK36\_v3, JQ781655; OmpK37-WT, WP\_002902433; PSC\_aa173, premature stop codon at amino acid 173; PSC\_aa251, premature stop codon at amino acid 251

**Supplementary Figure S1.** Alignment of the amino acid sequences of VEB-1, VEB-14 and VEB-25 with those of class A-lactamases PER-1, TEM-1, SHV-1, CTX-M-1, GES-1 and KPC-2.

"This supplementary material is hosted by Eurosurveillance as supporting information alongside the article [Outbreak of KPC-2-producing *Klebsiella pneumoniae* endowed with ceftazidime-avibactam resistance mediated through a VEB-1-mutant (VEB-25), Greece, September to November 2019], on behalf of the authors, who remain responsible for the accuracy and appropriateness of the content. The same standards for ethics, copyright, attributions and permissions as for the article apply. Supplements are not edited by Eurosurveillance and the journal is not responsible for the maintenance of any links or email addresses provided therein."

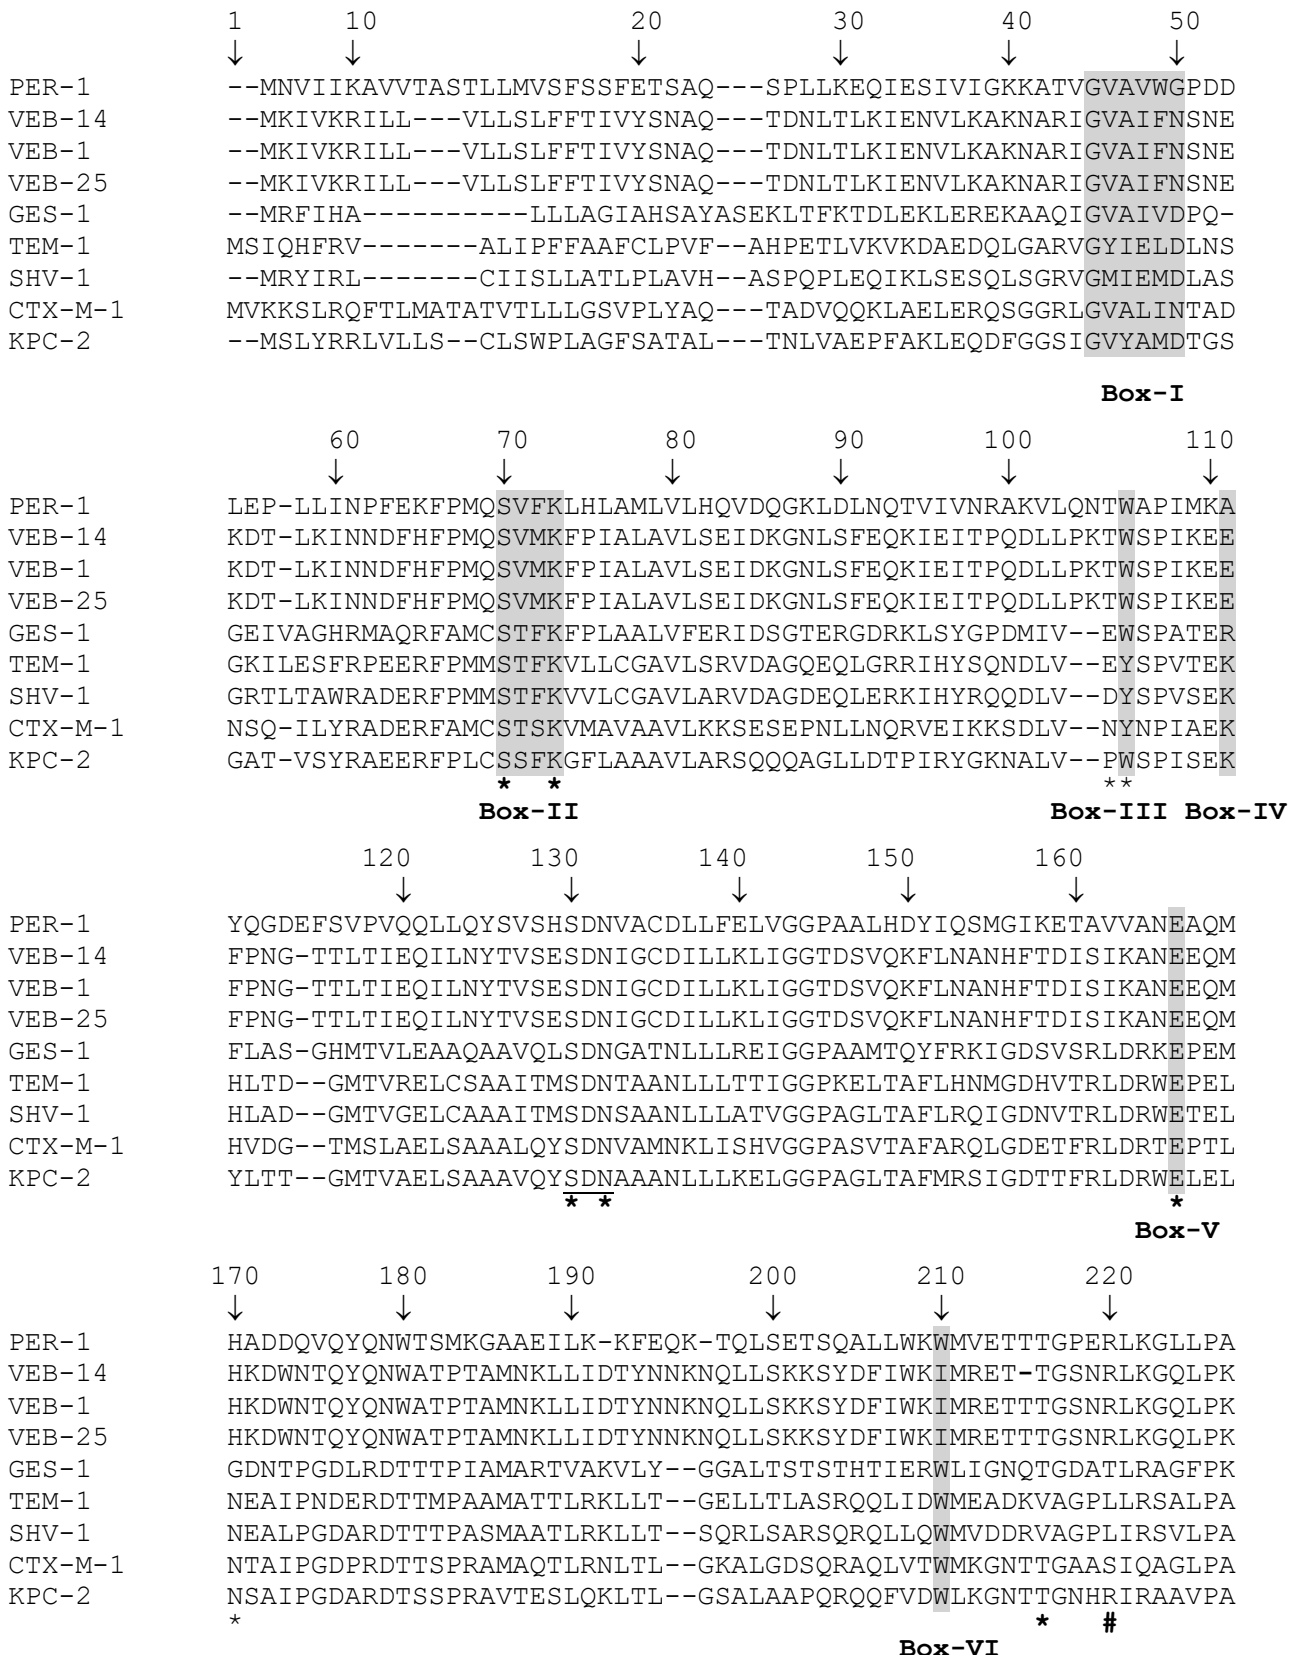

Supplement: 2000028_GALANI_Supplementary_Material.pdf [file 2000028_GALANI_Supplementary_Material.pdf]
